# Supplementary material for: CoMiniGut—a small volume in vitro colon model for the screening of gut microbial fermentation processes
Source: PeerJ. 2018 Jan 19;6:e4268. doi: 10.7717/peerj.4268 (PMC5777374; doi:10.7717/peerj.4268)
Supplement: Supplemental Information 1 [file peerj-06-4268-s004.xlsx]

## Sheet: Sheet1
Av	ST		Av	ST		Av	ST		Av	ST
F2 Lactulose			F2 Lactulose no pH control			F1 Lactulose			F1 Lactulose no pH control
5.79	0.0355903		5.675	0.134		5.78	0.02		5.7	0.06
5.79	0.0355903		5.625	0.148		5.78	0.02		5.66	0.05
5.79	0.0355903		5.6	0.141		5.78	0.02		5.63	0.08
5.79	0.0355903		5.59	0.127		5.78	0.02		5.6	0.1
5.79	0.0355903		5.567	0.083		5.78	0.02		5.6	0.11
5.79	0.0355903		5.543	0.092		5.78	0.02		5.61	0.11
5.79	0.0355903		5.527	0.099		5.78	0.02		5.6	0.11
5.79	0.0355903		5.517	0.11		5.78	0.02		5.59	0.11
5.79	0.0355903		5.515	0.096		5.78	0.02		5.58	0.09
5.8625	0.0330404		5.503	0.107		5.8475	0.0330404		5.56	0.09
5.8525	0.0330404		5.485	0.12		5.84	0.0294392		5.56	0.09
5.8475	0.0330404		5.473	0.124		5.89	0.0408248		5.55	0.08
5.895	0.0351188		5.46	0.134		5.89	0.0408248		5.53	0.08
5.89	0.0365148		5.44	0.144		5.9	0.0408248		5.51	0.08
5.955	0.0369685		5.42	0.164		5.955	0.0450925		5.48	0.09
5.9525	0.035		5.405	0.174		5.9475	0.0457347		5.45	0.1
6.0075	0.0359398		5.388	0.178		6.01	0.0547723		5.41	0.13
6.0075	0.0359398		5.37	0.182		6.01	0.0547723		5.36	0.17
6.0025	0.0386221		5.353	0.188		6.005	0.05		5.3	0.23
6.0675	0.0340343		5.325	0.193		6.075	0.0597216		5.22	0.31
6.0625	0.0359398		5.298	0.204		6.065	0.0597216		5.14	0.39
6.125	0.0369685		5.263	0.208		6.13	0.0632455		5.07	0.46
6.115	0.0369685		5.228	0.217		6.1225	0.0590903		5	0.52
6.105	0.0369685		5.188	0.227		6.11	0.060553		4.94	0.57
6.16	0.0408248		5.14	0.235		6.1725	0.0629153		4.89	0.61
6.2175	0.0457347		5.09	0.25		6.1475	0.0618466		4.84	0.64
6.19	0.0476095		5.035	0.255		6.2225	0.0670199		4.8	0.67
6.235	0.0519615		4.98	0.271		6.2775	0.0741058		4.76	0.69
6.2825	0.0660177		4.928	0.288		6.235	0.0660808		4.72	0.7
6.2475	0.0573731		4.875	0.301		6.245	0.0635085		4.69	0.72
6.2525	0.0689807		4.828	0.312		6.275	0.0568624		4.65	0.72
6.35	0.0637704		4.783	0.328		6.2775	0.0434933		4.61	0.71
6.375	0.0660808		4.74	0.337		6.3675	0.0512348		4.57	0.71
6.3775	0.0613052		4.703	0.342		6.325	0.0465475		4.53	0.71
6.3825	0.0556028		4.665	0.347		6.3775	0.0457347		4.49	0.7
6.3725	0.0485627		4.628	0.353		6.3225	0.0442531		4.45	0.68
6.355	0.043589		4.595	0.356		6.39	0.0588784		4.4	0.66
6.3475	0.0499166		4.563	0.352		6.4175	0.0618466		4.36	0.65
6.425	0.0613732		4.528	0.349		6.39	0.0697615		4.32	0.63
6.42	0.080829		4.5	0.342		6.3825	0.0736546		4.29	0.62
6.4075	0.0579511		4.468	0.337		6.3775	0.0694622		4.25	0.6
6.41	0.0535413		4.438	0.325		6.42	0.0716473		4.21	0.58
6.405	0.0465475		4.413	0.31		6.4825	0.0826136		4.19	0.57
6.4375	0.0478714		4.388	0.306		6.445	0.0718795		4.15	0.55
6.4975	0.0403113		4.368	0.313		6.4875	0.07932		4.13	0.54
6.5	0.0408248		4.35	0.317		6.4175	0.0655108		4.1	0.53
6.4975	0.0386221		4.33	0.317		6.4375	0.0596518		4.08	0.53
6.49	0.0408248		4.315	0.314		6.44	0.0547723		4.06	0.52
6.475	0.0479583		4.295	0.315		6.5425	0.060208		4.03	0.51
6.465	0.06245		4.278	0.314		6.5175	0.0512348		4.01	0.5
6.465	0.0750555		4.26	0.312		6.475	0.0420317		3.99	0.49
6.5525	0.0767572		4.245	0.315		6.5575	0.0485627		3.97	0.48
6.54	0.068313		4.233	0.317		6.4975	0.0419325		3.95	0.47
6.53	0.068313		4.22	0.314		6.535	0.0341565		3.94	0.47
6.525	0.0597216		4.203	0.317		6.56	0.0583095		3.92	0.46
6.5175	0.0464579		4.188	0.32		6.5975	0.12816		3.91	0.46
6.6125	0.0499166		4.175	0.323		6.56	0.146742		3.89	0.45
6.6025	0.0590903		4.168	0.322		6.825	0.309246		3.88	0.44
6.585	0.0655744		4.153	0.326		6.62	0.0469042		3.87	0.44
6.5675	0.0771902		4.143	0.332		6.7275	0.235849		3.85	0.43
6.585	0.0750555		4.128	0.342		6.58	0.123288		3.84	0.42
6.635	0.0675771		4.11	0.346		6.595	0.131783		3.83	0.41
6.6275	0.0758837		4.1	0.353		6.6275	0.126062		3.82	0.4
6.6425	0.085		4.09	0.354		6.6575	0.118989		3.81	0.39
6.645	0.102794		4.078	0.357		6.6875	0.112953		3.79	0.4
6.6775	0.104363		4.06	0.349		6.7175	0.105317		3.76	0.39
6.715	0.107548		4.045	0.345		6.7525	0.101776		3.75	0.38
6.75	0.102307		4.035	0.348		6.7775	0.0987843		3.75	0.37
6.7775	0.101448		4.028	0.354		6.7975	0.0991211		3.75	0.35
6.8075	0.0942956		4.02	0.354		6.8175	0.100125		3.74	0.34
6.8275	0.0921502		4.01	0.355		6.8375	0.100457		3.73	0.33
6.85	0.0828654		3.998	0.357		6.8525	0.0974252		3.72	0.32
6.865	0.0818535		3.988	0.362		6.8675	0.095		3.71	0.31
6.88	0.0812404		3.98	0.362		6.875	0.0946925		3.7	0.3
6.895	0.081035		3.965	0.366		6.8875	0.0974252		3.69	0.29
6.91	0.080829		3.955	0.366		6.895	0.0974679		3.68	0.28
6.9225	0.0838153		3.948	0.366		6.9025	0.0956992		3.67	0.27
6.935	0.081035		3.938	0.366		6.91	0.0959166		3.66	0.26
6.9475	0.084212		3.93	0.366		6.915	0.0911043		3.65	0.25
6.9575	0.0853913		3.923	0.371		6.9175	0.0928709		3.64	0.24
6.9675	0.0853913		3.915	0.371		6.925	0.0911043		3.64	0.23
6.9775	0.0853913		3.905	0.371		6.9325	0.0914239		3.63	0.22
6.99	0.0890693		3.9	0.376		6.9325	0.0914239		3.62	0.21
7.0025	0.0928709		3.89	0.376		6.9375	0.088835		3.61	0.2
7.01	0.0959166		3.88	0.376		6.9425	0.0914239		3.6	0.19
7.025	0.0967815		3.875	0.381		6.9425	0.0914239		3.6	0.18
7.0375	0.0984463		3.868	0.381		6.9475	0.088835		3.59	0.18
7.0525	0.0997915		3.863	0.376		6.95	0.0909212		3.58	0.17
7.065	0.101489		3.858	0.381		6.9525	0.0939415		3.57	0.16
7.0775	0.0921502		3.85	0.381		6.9575	0.0963933		3.57	0.15
7.085	0.0932738		3.843	0.386		6.9575	0.0963933		3.56	0.15
7.09	0.0875595		3.84	0.381		6.96	0.0909212		3.56	0.15
7.0925	0.084212		3.83	0.381		6.96	0.0909212		3.55	0.15
7.09	0.0824621		3.825	0.386		6.9625	0.0939415		3.55	0.14
7.09	0.0824621		3.82	0.381		6.9625	0.0939415		3.54	0.13
7.09	0.0778888		3.815	0.386		6.965	0.0971253		3.54	0.13
