# Supplementary material for: CoMiniGut—a small volume in vitro colon model for the screening of gut microbial fermentation processes
Source: PeerJ. 2018 Jan 19;6:e4268. doi: 10.7717/peerj.4268 (PMC5777374; doi:10.7717/peerj.4268)
Supplement: Supplemental Information 2 [file peerj-06-4268-s005.xlsx]

## Sheet: ANOVA_HMO_L7_Baby2
OTU	prob	Bonferroni_corrected	FDR_corrected	N_mean	3SL_mean	6SL_mean	3FL_mean	OG_mean		N_mean	3SL_mean	6SL_mean	3FL_mean	OG_mean
k__Bacteria;p__Actinobacteria;c__Actinobacteria;o__Bifidobacteriales;f__Bifidobacteriaceae;g__Bifidobacterium;s__	1.18e-05	0.000437696	0.000437696	0.000871531	0.132515	0.000758795	0.07582	0.00256441		0.087	13.251	0.076	7.582	0.256
k__Bacteria;p__Actinobacteria;c__Actinobacteria;o__Bifidobacteriales;f__Bifidobacteriaceae;g__Bifidobacterium;s__adolescentis	2.74e-05	0.00101447	0.000507234	0.000393069	0.103652	0.000331476	0.0564036	0.00173708		0.039	10.365	0.033	5.64	0.174
Unassigned;Other;Other;Other;Other;Other;Other	0.00181392	0.0671149	0.0223716	4.01e-06	0.000213456	4.3e-06	0.000358441	2.15e-06		0	0.021	0	0.036	0
k__Bacteria;p__Actinobacteria;c__Actinobacteria;o__Bifidobacteriales;f__Bifidobacteriaceae;g__Bifidobacterium;s__longum	0.00264591	0.0978985	0.0244746	0.000732672	0.0193595	0.000566179	0.0213806	0.00190622		0.073	1.936	0.057	2.138	0.191
k__Bacteria;p__Proteobacteria;c__Gammaproteobacteria;o__Enterobacteriales;f__Enterobacteriaceae;Other;Other	0.00449994	0.166498	0.0332996	0.0385603	0.022866	0.0397944	0.0519391	0.138835		3.856	2.287	3.979	5.194	13.883
k__Bacteria;p__Proteobacteria;c__Gammaproteobacteria;o__Enterobacteriales;f__Enterobacteriaceae;g__Enterobacter;s__ludwigii	0.00664264	0.245778	0.0409629	0.000153779	7.88e-05	7.69e-05	0.000137699	0.000525717		0.015	0.008	0.008	0.014	0.053
k__Bacteria;p__Actinobacteria;c__Actinobacteria;o__Bifidobacteriales;f__Bifidobacteriaceae;g__Bifidobacterium;Other	0.00697984	0.258254	0.0368934	1.2e-05	0.00154185	8.88e-06	0.0011781	1.75e-05		0.001	0.154	0.001	0.118	0.002
k__Bacteria;p__Proteobacteria;c__Gammaproteobacteria;o__Enterobacteriales;f__Enterobacteriaceae;g__Xenorhabdus;Other	0.0102154	0.377969	0.0472461	1.31e-05	0.000188552	2.14e-05	0.000173749	6.87e-05		0.001	0.019	0.002	0.017	0.007
k__Bacteria;p__Proteobacteria;c__Gammaproteobacteria;o__Enterobacteriales;f__Enterobacteriaceae;g__Enterobacter;s__cloacae	0.016461	0.609058	0.0676731	5.81e-05	0.00074524	2.1e-05	0.00128022	0.000227418		0.006	0.075	0.002	0.128	0.023
k__Bacteria;p__Proteobacteria;c__Gammaproteobacteria;o__Enterobacteriales;f__Enterobacteriaceae;g__Erwinia;s__	0.0364856	1.34997	0.134997	5.33e-05	3.67e-05	4.34e-05	0.000103245	0.000200946		0.005	0.004	0.004	0.01	0.02
k__Bacteria;p__Proteobacteria;c__Gammaproteobacteria;o__Enterobacteriales;f__Enterobacteriaceae;g__Enterobacter;Other	0.0376936	1.39466	0.126787	0.00328213	0.000878933	0.00355492	0.00379789	0.00482976		0.328	0.088	0.355	0.38	0.483
k__Bacteria;p__Proteobacteria;c__Gammaproteobacteria;o__Enterobacteriales;f__Enterobacteriaceae;g__;s__	0.0523072	1.93537	0.161281	0.372837	0.690275	0.638918	0.666408	0.772296		37.284	69.028	63.892	66.641	77.23
k__Bacteria;p__Proteobacteria;c__Gammaproteobacteria;o__Enterobacteriales;f__Enterobacteriaceae;g__Erwinia;s__dispersa	0.0984746	3.64356	0.280274	1.67e-05	4.56e-06	0	2.41e-05	2.21e-06		0.002	0	0	0.002	0
k__Bacteria;p__Proteobacteria;c__Gammaproteobacteria;o__Enterobacteriales;f__Enterobacteriaceae;g__Dickeya;s__	0.10869	4.02153	0.287252	0.0004571	2.61e-06	0.000209857	2.1e-05	1.27e-05		0.046	0	0.021	0.002	0.001
k__Bacteria;p__Firmicutes;c__Clostridia;o__Clostridiales;f__Ruminococcaceae;g__;s__	0.111595	4.12903	0.275268	0.00209602	1.52e-05	1.66e-05	2.5e-05	5.25e-06		0.21	0.002	0.002	0.002	0.001
k__Bacteria;p__Firmicutes;c__Clostridia;o__Clostridiales;f__Lachnospiraceae;g__Blautia;s__	0.112393	4.15854	0.259909	0.00909817	2.23e-06	2.69e-05	1.2e-05	1.04e-06		0.91	0	0.003	0.001	0
k__Bacteria;p__Firmicutes;c__Bacilli;o__Bacillales;f__Staphylococcaceae;g__Staphylococcus;s__aureus	0.112439	4.16025	0.24472	0.039348	1.36e-06	2.03e-05	1.46e-05	1.1e-06		3.935	0	0.002	0.001	0
k__Bacteria;p__Firmicutes;c__Clostridia;o__Clostridiales;f__Lachnospiraceae;g__;s__	0.113704	4.20706	0.233725	0.00440114	1.61e-05	1.78e-05	3.44e-05	8.1e-06		0.44	0.002	0.002	0.003	0.001
k__Bacteria;p__Firmicutes;c__Clostridia;o__Clostridiales;f__Clostridiaceae;g__Clostridium;s__	0.116705	4.31808	0.227267	0.0156668	4.45e-05	0.0756194	2.05e-05	4.31e-05		1.567	0.004	7.562	0.002	0.004
k__Bacteria;p__Firmicutes;c__Clostridia;o__Clostridiales;f__Clostridiaceae;g__;s__	0.118205	4.37357	0.218679	0.00396232	2.35e-05	0.0174964	2.03e-05	2.61e-05		0.396	0.002	1.75	0.002	0.003
k__Bacteria;p__Proteobacteria;c__Gammaproteobacteria;o__Enterobacteriales;f__Enterobacteriaceae;g__Proteus;s__	0.120301	4.45115	0.211959	0.000116452	1.68e-05	4.05e-05	6.15e-05	3.95e-05		0.012	0.002	0.004	0.006	0.004
k__Bacteria;p__Firmicutes;c__Bacilli;o__Lactobacillales;f__Enterococcaceae;Other;Other	0.126822	4.69242	0.213292	2.11e-05	0.000375189	0.000915477	2.64e-05	2.88e-05		0.002	0.038	0.092	0.003	0.003
k__Bacteria;p__Firmicutes;c__Clostridia;o__Clostridiales;f__Clostridiaceae;g__Clostridium;Other	0.127003	4.6991	0.204309	0.00176315	0.000187798	0.00771206	0.000122141	0.000249303		0.176	0.019	0.771	0.012	0.025
k__Bacteria;p__Firmicutes;c__Clostridia;o__Clostridiales;f__Clostridiaceae;Other;Other	0.127294	4.70989	0.196246	0.000453094	6.97e-06	0.0015119	3.05e-06	1.04e-05		0.045	0.001	0.151	0	0.001
k__Bacteria;p__Proteobacteria;c__Gammaproteobacteria;o__Enterobacteriales;f__Enterobacteriaceae;g__Trabulsiella;s__	0.184849	6.83941	0.273577	5.75e-05	5.69e-05	0.000104551	0.00012693	0.000176739		0.006	0.006	0.01	0.013	0.018
k__Bacteria;p__Firmicutes;c__Bacilli;o__Lactobacillales;f__Enterococcaceae;g__Enterococcus;s__	0.205374	7.59885	0.292263	0.000122954	0.00295156	0.00723331	0.000187188	0.000231046		0.012	0.295	0.723	0.019	0.023
k__Bacteria;p__Firmicutes;c__Clostridia;o__Clostridiales;f__Veillonellaceae;g__Veillonella;s__	0.225834	8.35586	0.309476	0	4.15e-06	3.13e-05	8.79e-06	1.84e-05		0	0	0.003	0.001	0.002
k__Bacteria;p__Proteobacteria;c__Gammaproteobacteria;o__Enterobacteriales;f__Enterobacteriaceae;g__Erwinia;Other	0.297944	11.0239	0.393712	0.00149431	0.000366016	0.00168095	0.00188099	0.00113767		0.149	0.037	0.168	0.188	0.114
k__Bacteria;p__Proteobacteria;c__Gammaproteobacteria;Other;Other;Other;Other	0.345913	12.7988	0.441337	0.00225711	0.00275279	0.00319482	0.00425409	0.00236207		0.226	0.275	0.319	0.425	0.236
k__Bacteria;p__Proteobacteria;c__Gammaproteobacteria;o__Enterobacteriales;f__Enterobacteriaceae;g__Klebsiella;s__	0.352815	13.0541	0.435138	0.112016	0.0141001	0.198939	0.113751	0.0720538		11.202	1.41	19.894	11.375	7.205
k__Bacteria;p__Firmicutes;c__Bacilli;o__Lactobacillales;f__Streptococcaceae;g__Streptococcus;s__	0.355492	13.1532	0.424297	2.07e-05	1.41e-05	7.06e-05	2.14e-05	1.53e-05		0.002	0.001	0.007	0.002	0.002
k__Bacteria;p__Bacteroidetes;c__Bacteroidia;o__Bacteroidales;f__Porphyromonadaceae;g__Parabacteroides;s__distasonis	0.363467	13.4483	0.420259	4.6e-05	4.43e-05	0.000177116	9.8e-05	6.3e-05		0.005	0.004	0.018	0.01	0.006
k__Bacteria;p__Firmicutes;c__Clostridia;o__Clostridiales;f__Veillonellaceae;g__Veillonella;s__dispar	0.558908	20.6796	0.626654	1.49e-05	4.3e-06	8.88e-06	6.18e-06	1.53e-05		0.001	0	0.001	0.001	0.002
k__Bacteria;p__Firmicutes;c__Bacilli;o__Lactobacillales;f__Lactobacillaceae;g__Lactobacillus;s__	0.567432	20.995	0.617499	1.21e-05	0.00649475	0.000455881	6.64e-05	8.28e-05		0.001	0.649	0.046	0.007	0.008
k__Bacteria;p__Bacteroidetes;c__Bacteroidia;o__Bacteroidales;f__Bacteroidaceae;g__Bacteroides;s__	0.727457	26.9159	0.769026	8.88e-06	2.74e-05	3.94e-05	6.75e-05	4.09e-05		0.001	0.003	0.004	0.007	0.004
k__Bacteria;p__Bacteroidetes;c__Bacteroidia;o__Bacteroidales;f__Bacteroidaceae;g__Bacteroides;s__caccae	0.73318	27.1277	0.753546	0	7.95e-06	1.7e-05	1.38e-05	1.79e-05		0	0.001	0.002	0.001	0.002
k__Bacteria;p__Firmicutes;c__Clostridia;o__Clostridiales;f__Clostridiaceae;g__Clostridium;s__perfringens	0.910263	33.6797	0.910263	2.43e-05	8.22e-05	6.65e-05	8.18e-05	9.1e-05		0.002	0.008	0.007	0.008	0.009
